# Supplementary material for: A turn-on FRET sensor based on dichlorofluorescein and AuNPs for rapid and ultrasensitive detection of ambroxol hydrochloride in urine
Source: Royal Society of Chemistry journal article supplement (doi:10.1039/c6nj04003a), 2017-01-01
Supplement: c6nj04003a1.pdf [file c6nj04003a1.pdf]

1 **Electronic Supplementary Information**

2 **A turn-on FRET sensor based on dichlorofluorescein and AuNPs for**  
3 **rapid and ultrasensitive detection of ambroxol hydrochloride in urine**

4 Pinping Wu<sup>a,1</sup>, Nan Li<sup>a</sup>, Yu Gu<sup>a</sup>, Yuhan Guo<sup>a</sup>, Haoshuang Lou<sup>a</sup>, Hua He<sup>a,b,c,\*</sup>

5 **Caption:**

6 Fig. S1 Images of DCF-Sodium Citrate complex(A) and AMB-Sodium Citrate complex(B) by  
7 computer simulation in Discovery studio 2.5

8 Table S1 Repeatability of the determination method for AMB

9 Table S2 Comparison of the proposed method for the determination of AMB with standard  
10 RP-HPLC method

11

12

13

14

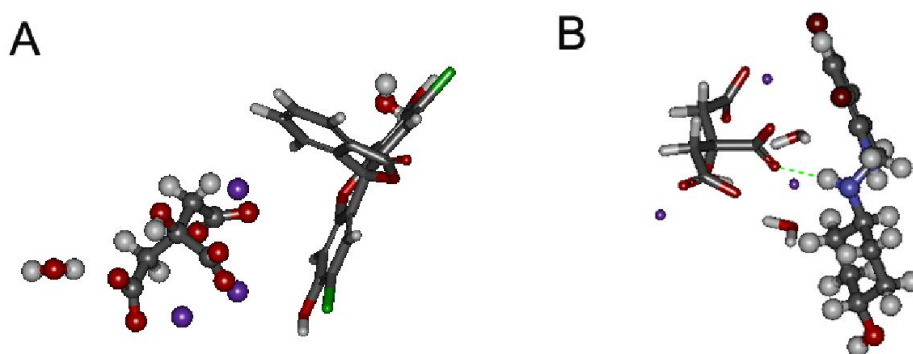

15 **Fig. S1** Images of DCF-Sodium Citrate complex(A) and AMB-Sodium Citrate  
16 complex(B) by computer simulation in Discovery studio 2.5

17

18

19

20

21

1

2

**Table S1** Repeatability of the determination method for AMB

| Sample | $(F-F_0)/F_0$ | $C(\times 10^{-8} \text{ M})$ | $C_{\text{平均}}(\times 10^{-8} \text{ M})$ | RSD (% , n=6) |
|--------|---------------|-------------------------------|-------------------------------------------|---------------|
| 1      | 0.8543        | 4.766                         |                                           |               |
| 2      | 0.8982        | 5.025                         |                                           |               |
| 3      | 0.8342        | 4.648                         | 4.823                                     | 2.9           |
| 4      | 0.9021        | 5.048                         |                                           |               |
| 5      | 0.8496        | 4.739                         |                                           |               |
| 6      | 0.8453        | 4.713                         |                                           |               |

3

4

5

6

7

8

**Table S2** Comparison of the proposed method for the determination of AMB with standard RP-HPLC method

9

| Analytical method                   | Added amount ( $\mu\text{g/mL}$ ) | Found amount (ng/mL)                               | RSD (% , n = 3) | Average recovery (% , n = 3) | $t_{0.05,10}=2.228$ |
|-------------------------------------|-----------------------------------|----------------------------------------------------|-----------------|------------------------------|---------------------|
| RP-HPLC                             | 20.00                             | 20.77<br>19.38<br>19.77<br>19.65<br>20.95<br>21.23 | 3.4             | 101.5                        | 0.99                |
| Fluorometry/<br>FRET<br>(DCF-AuNPs) | 20.00                             | 18.96<br>21.04<br>19.87<br>18.65<br>19.32<br>20.86 | 4.1             | 98.9                         |                     |

10

11

12
